# Supplementary material
Source: PubMed Central journal article supplement (PMC7111001)
Supplement: mmc1.pdf [file mmc1.pdf]

**Supplemental Information**

**Type I Interferon Signaling Disrupts the Hepatic  
Urea Cycle and Alters Systemic Metabolism  
to Suppress T Cell Function**

Alexander Lercher, Anannya Bhattacharya, Alexandra M. Popa, Michael Caldera, Moritz F. Schlapansky, Hatoon Baazim, Benedikt Agerer, Bettina Gürtl, Lindsay Kosack, Peter Májek, Julia S. Brunner, Dijana Vitko, Theresa Pinter, Jakob-Wendelin Genger, Anna Orlova, Natalia Pikor, Daniela Reil, Maria Ozsvár-Kozma, Ulrich Kalinke, Burkhard Ludewig, Richard Moriggl, Keiryn L. Bennett, Jörg Menche, Paul N. Cheng, Gernot Schabbauer, Michael Trauner, Kristaps Klavins, and Andreas Bergthaler

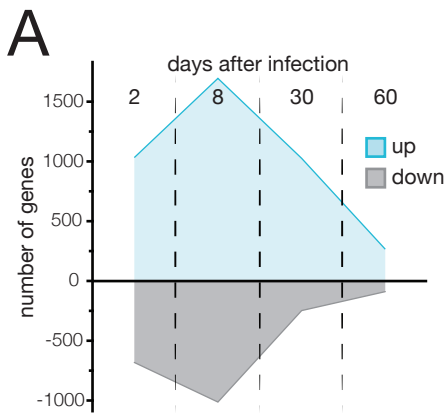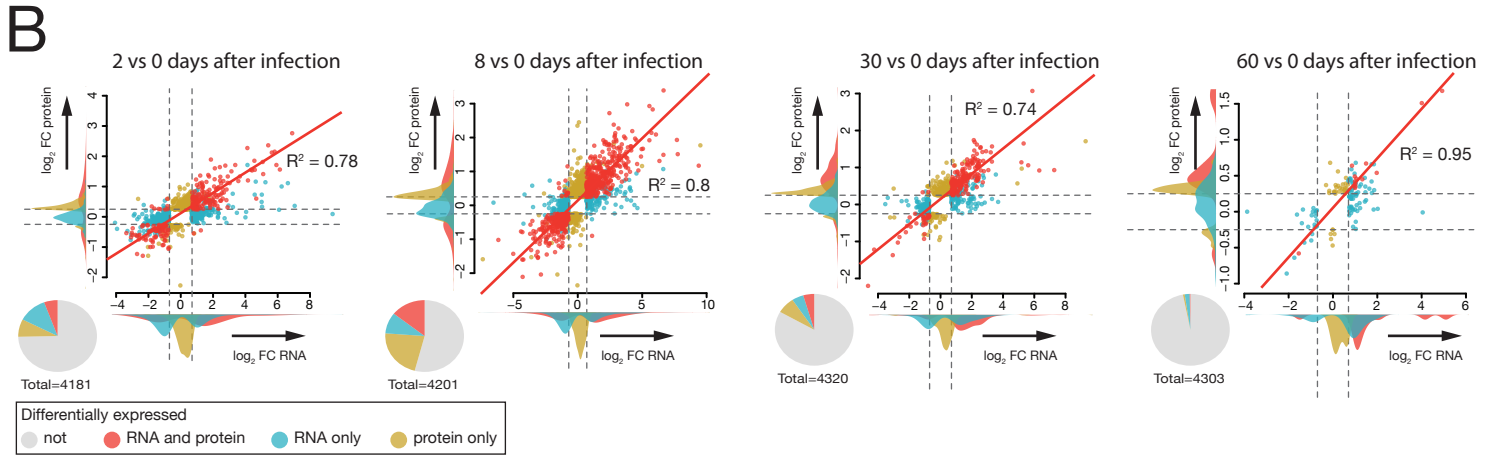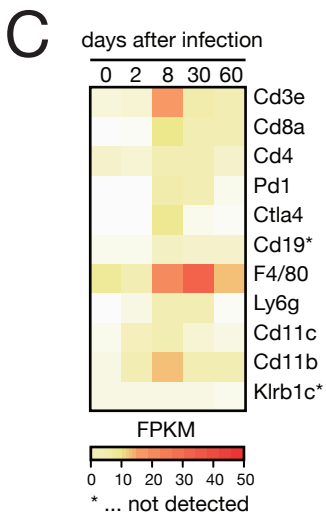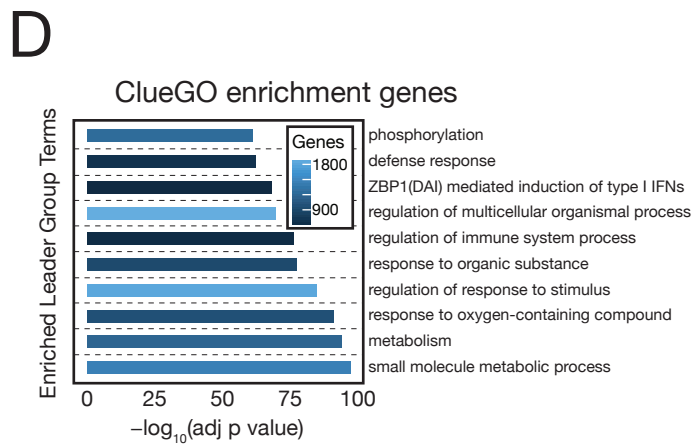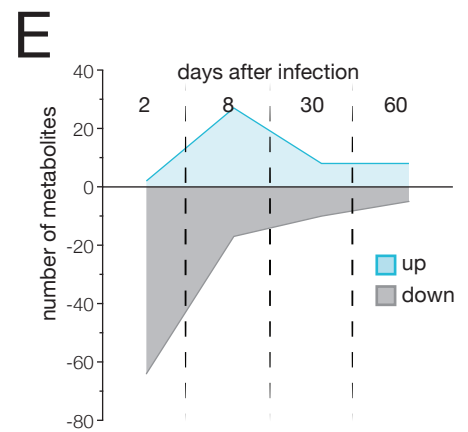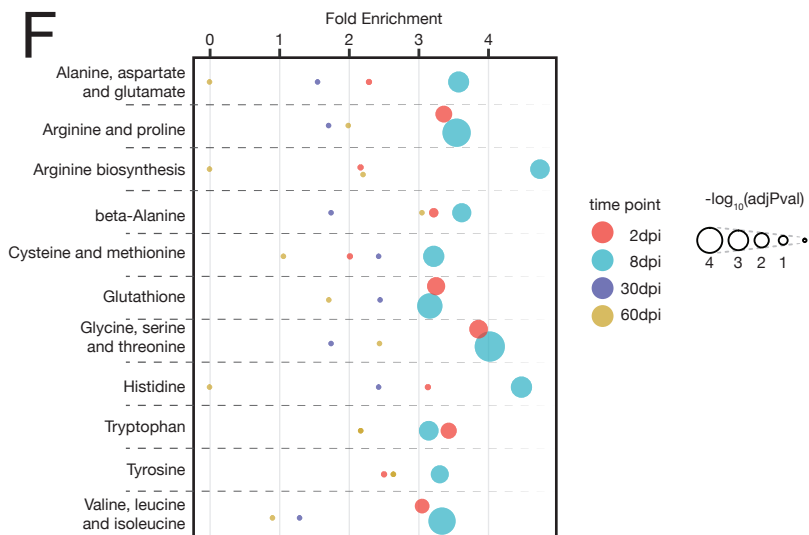

**Figure S1. Systems biology approach to transcriptomic, proteomic and metabolomic changes in liver tissue and systemic metabolism during LCMV CI13 infection. Related to Figure 1.**

(A) Number of significantly up- or downregulated genes in LCMV-infected liver tissue 2, 8, 30 or 60 days after infection compared to naïve liver tissue (n = 3). (B) Correlation of transcriptomic and proteomic changes at the corresponding time points after LCMV infection (n = 3). (C) Heatmap of expression values (FPKM) of indicated immune cell markers in liver tissue during the course of LCMV infection (n = 3). (D) Enriched GO terms and pathways (ClueGO) on the union of significantly differentially expressed transcripts at any time point (n = 3). (E) Number of significantly up- or downregulated serum metabolites of LCMV-infected wild type mice compared to naïve serum metabolite levels (n = 4). (F) Enrichment analyses of significantly regulated transcripts for amino acid metabolic pathways (KEGG) at the indicated time points after LCMV infection (n = 3). For (A-F) transcriptomic and proteomic data is derived from one experiment.

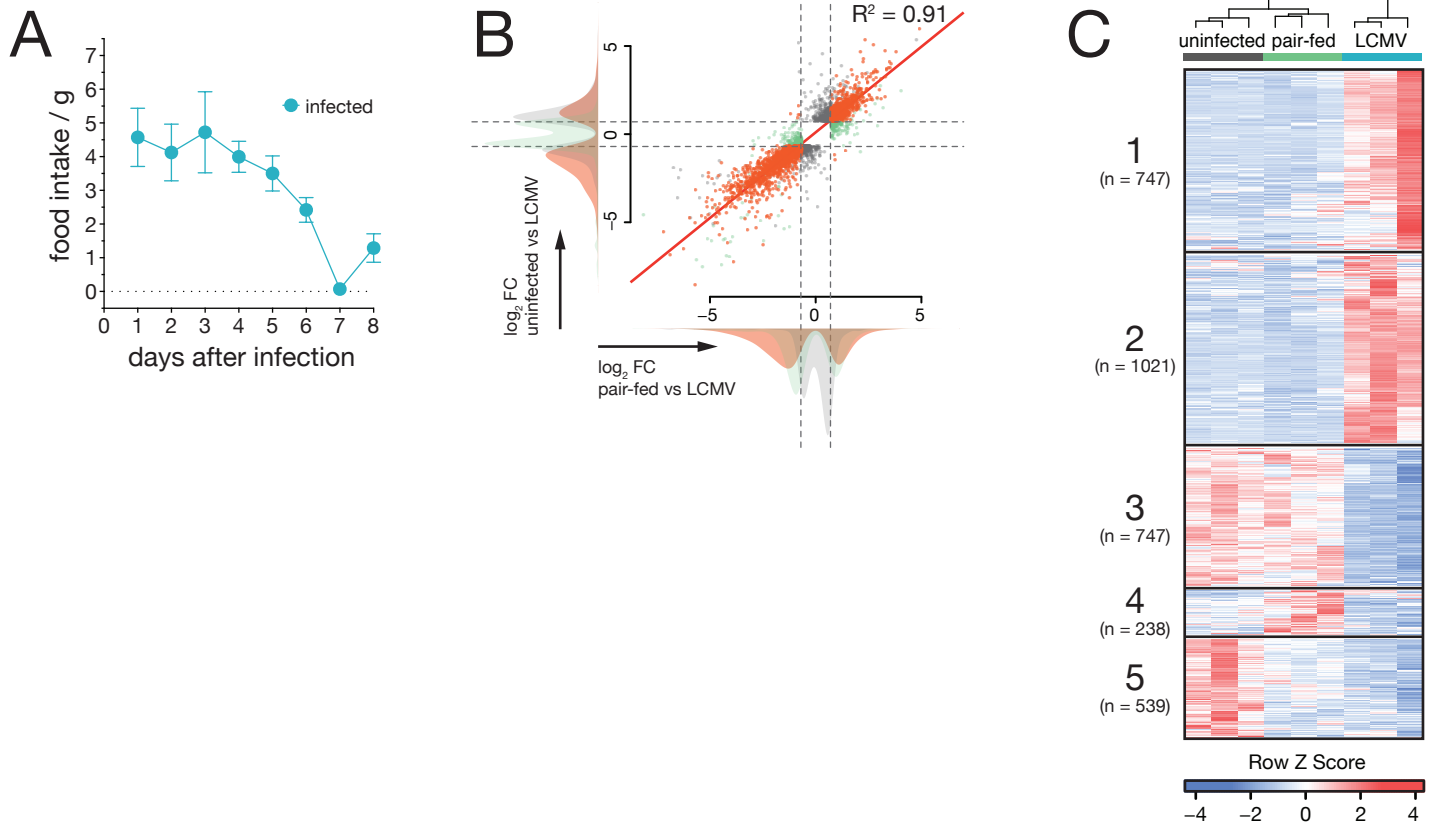

**Figure S2. Transcriptome analyses of naïve and pair-fed compared to LCMV-infected animals. Related to Figure 2.**

(A) Food intake of LCMV-infected animals ( $n = 3$ ) up to 8 days post infection. (B) Correlation of significantly regulated transcripts in the livers of naïve and pair-fed animals (8 days) compared to LCMV-infected animals ( $n = 3$ ). (C) Hierarchical clustering (FPKM, k-means, Pearson's correlation) of significantly deregulated transcripts in liver tissue of naïve, pair-fed and LCMV-infected animals ( $n = 3$ ). For (A-C) transcriptomic data is derived from one experiment. Symbols represent the arithmetic mean  $\pm$ S.E.M.

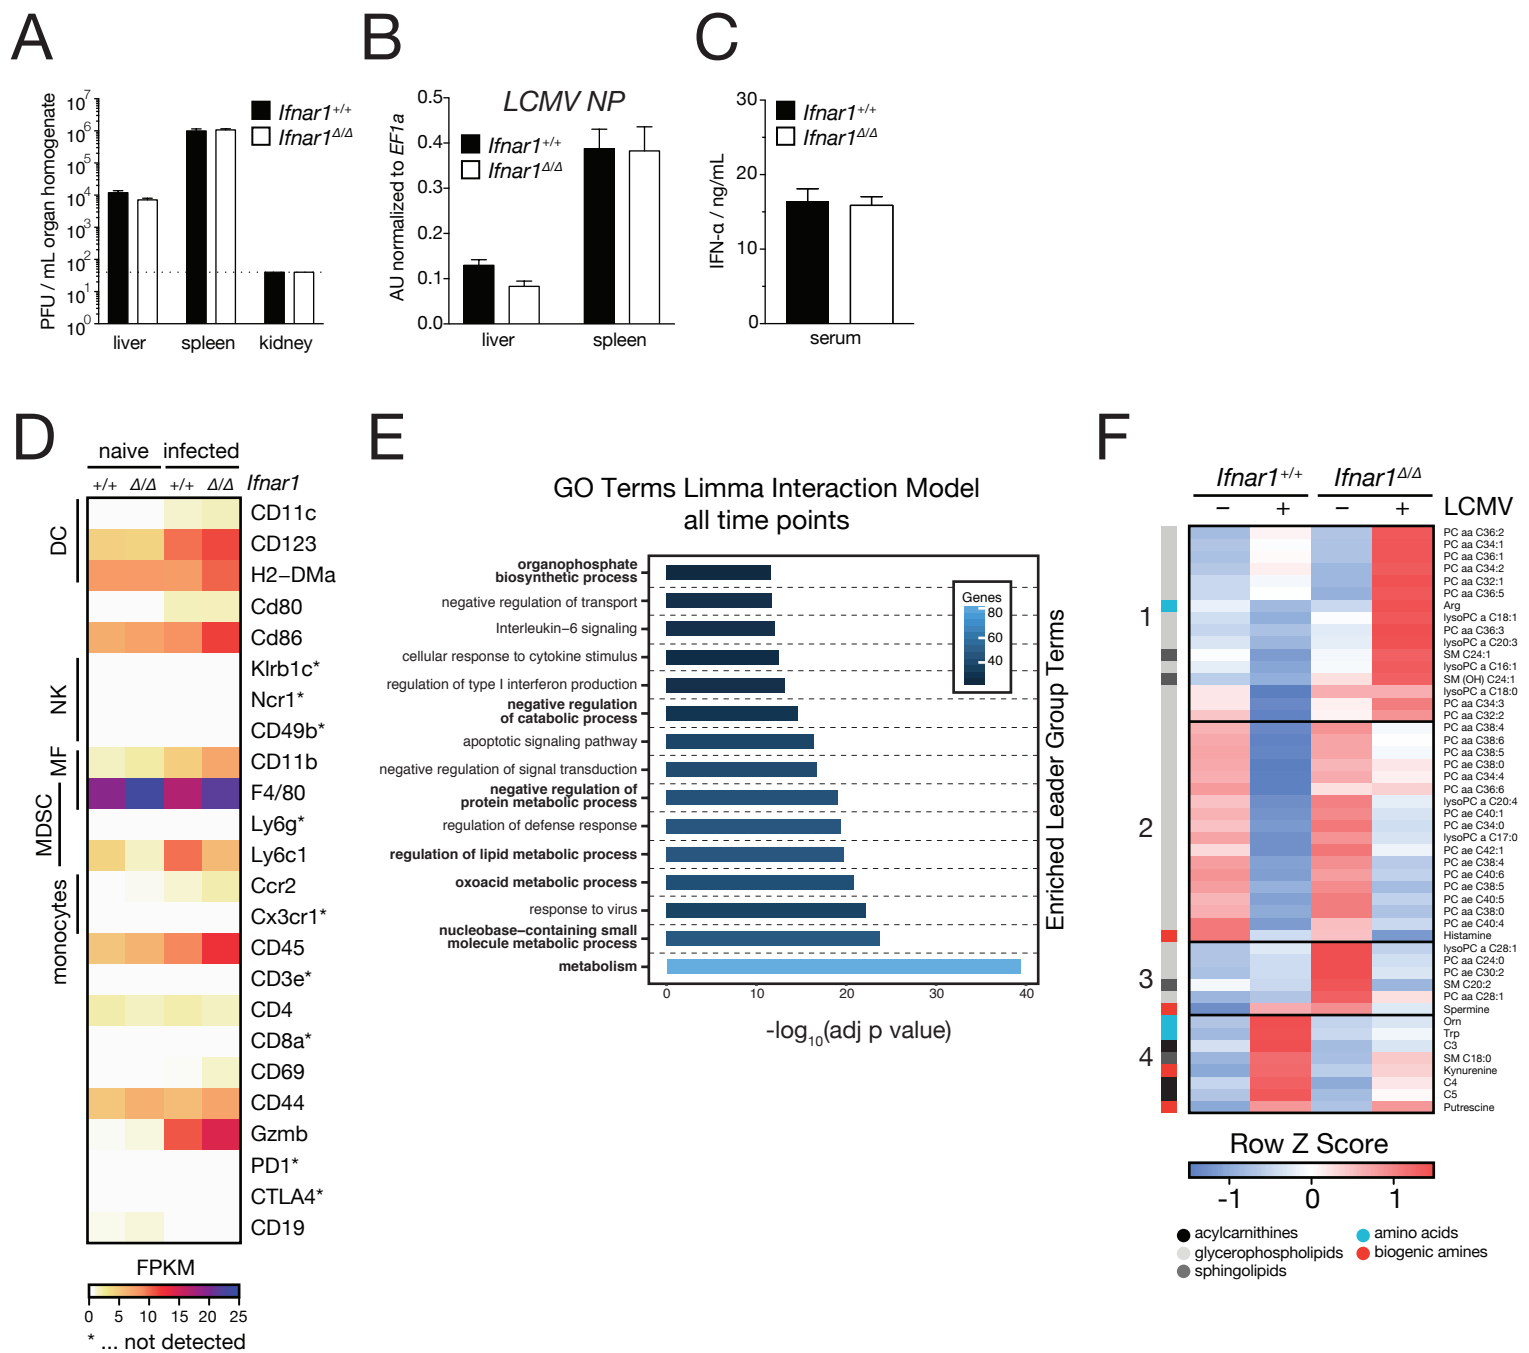

**Figure S3. Transcriptome and systemic metabolome analyses of LCMV Cl13 infected *Alb-Cre ERT2 Ifnar1<sup>fl/fl</sup>* mice. Related to Figure 3.**

(A) Viremia and (B) RNemia in organs ( $n = 4$ ), and (C) IFN- $\alpha$  serum levels of *Alb-Cre ERT2 Ifnar1<sup>fl/fl</sup>* (*Ifnar1* <sup>$\Delta/\Delta$</sup> ) and *Ifnar1*<sup>+/+</sup> mice 1.5 days after infection ( $n = 4$ ). (D) Heatmap of expression values (FPKM) of the indicated immune cell markers in naïve or infected *Ifnar1*<sup>+/+</sup> and *Ifnar1* <sup>$\Delta/\Delta$</sup>  mice ( $n = 3$ ). (E) Enriched GO terms on the union of significantly regulated (limma interaction model) genes ( $n = 3$ ). (F) Significantly regulated serum metabolites in naïve and infected *Ifnar1* <sup>$\Delta/\Delta$</sup>  and *Ifnar1*<sup>+/+</sup> animals ( $n = 3$ , k-means, Pearson's correlation). For (A-C) one of two representative experiments are shown. For (D-F) transcriptomic and metabolomic data is derived from one experiment. AU = arbitrary units. Symbols represent the arithmetic mean  $\pm$ S.E.M. Dotted line implicates limit of detection. ns = not significant \*  $P < 0.05$  \*\*  $P < 0.01$  \*\*\*  $P < 0.001$ (Student's t-test).

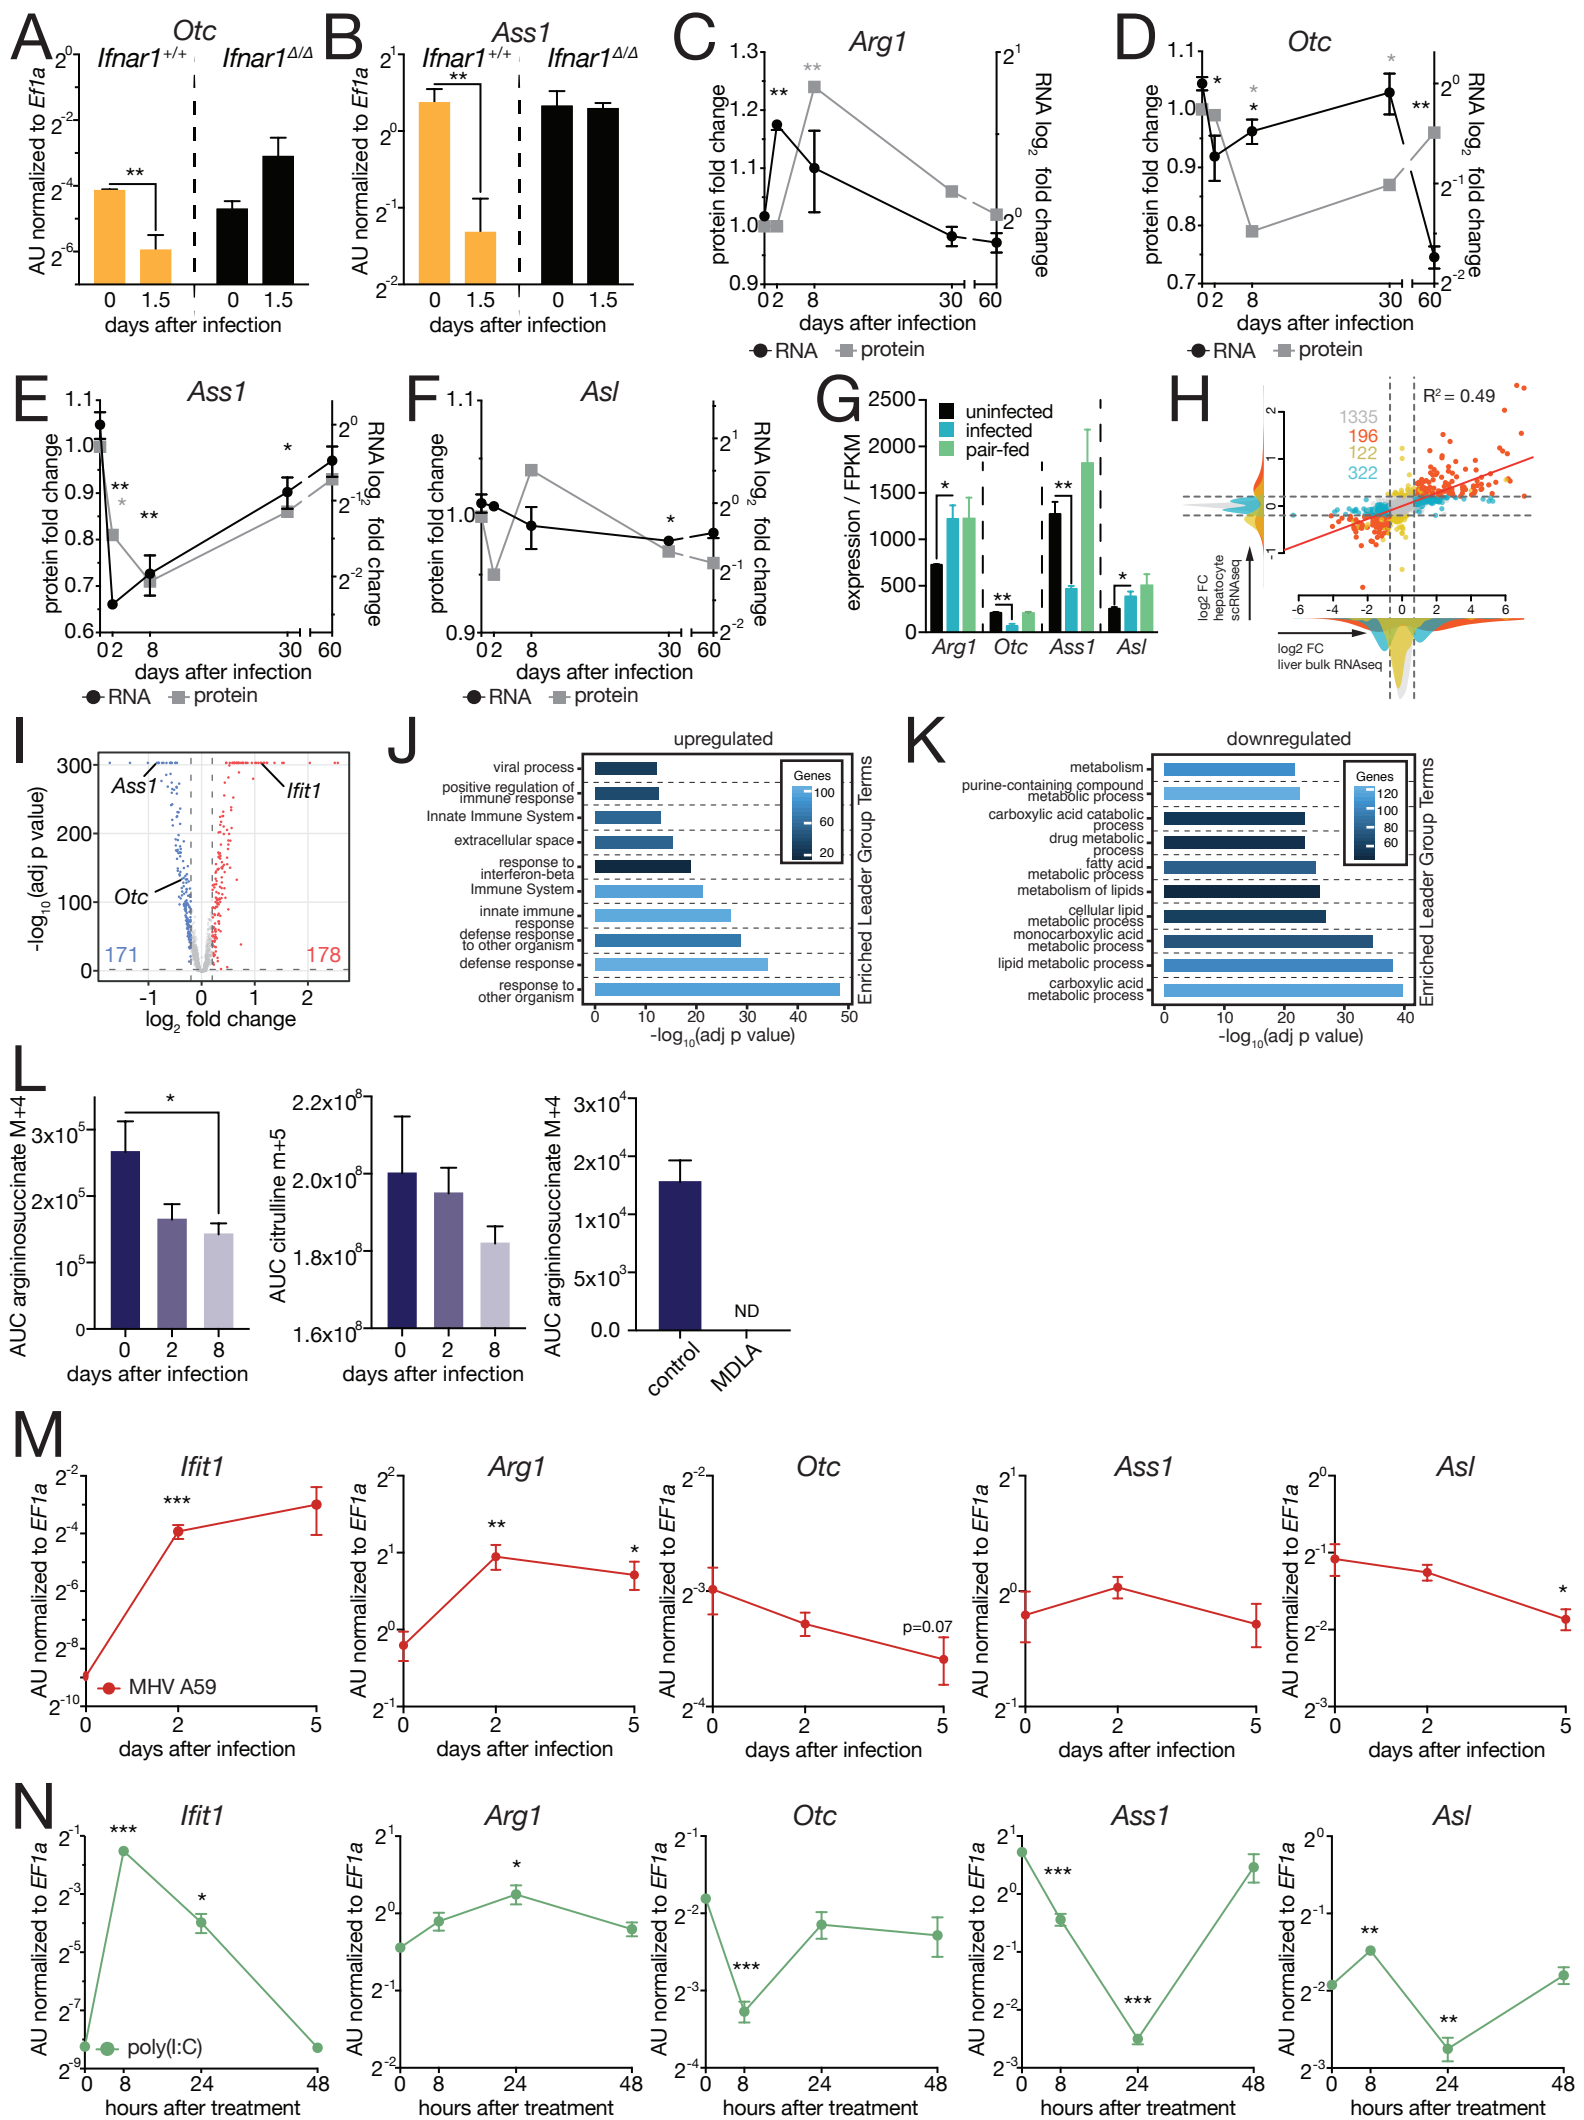

**Figure S4. IFNAR1 signaling and viral infection perturb the urea cycle in hepatocytes. Related to Figure 4.**

Real-time PCR of *Otc* (A) and *Ass1* (B) in *Alb-Cre ERT2 Ifnar1<sup>fl/fl</sup> (Ifnar1<sup>Δ/Δ</sup>)* and *Ifnar1<sup>+/+</sup>* mice 1.5 days after infection (n = 3-4). (D-F) Long-term kinetics of urea cycle gene transcript and protein abundances of *Arg1*, *Otc*, *Ass1* and *Asl* in liver tissue upon LCMV-infection (n = 3). (G) Expression values (FPKM) of *Arg1*, *Otc*, *Ass1* and *Asl* of naïve, pair-fed and LCMV-infected (8 days after infection) wild type animals (n = 3). (H) Correlation plot (Spearman correlation) of significantly changed genes in scRNA-seq dataset (n = 2, pooled for each condition) compared to RNA-seq data obtained from bulk liver tissue (n = 3, Figure 1). (I) Volcano plot of scRNA-seq data displaying up- and downregulated transcripts (n = 2, pooled for each condition); arrows indicate the urea cycle genes *Otc* and *Ass1* and the type I interferon stimulated gene *Ifit1*. (J, K) Enriched GO terms of significantly up- and downregulated genes in hepatocytes derived from naïve or LCMV-infected mice (2 days, n = 2, pooled for each condition). (L) Detection of <sup>13</sup>C labeled reaction products for ASS1 (<sup>13</sup>C<sub>4</sub> argininosuccinate) and OTC (<sup>13</sup>C<sub>5</sub> citrulline) after pulsing liver lysates of naïve or LCMV-infected animals (2 and 8 days after infection) for 30 minutes with the respective <sup>13</sup>C labeled substrates for OTC and ASS1 (n = 4-5) and detection of the ASS1 reaction product <sup>13</sup>C<sub>4</sub> argininosuccinate in naïve liver lysates in the presence or absence of the ASS1 inhibitor α-methyl-DL-aspartic acid (n = 3). (M) Expression of *Ifit1* and urea cycle-associated genes in liver tissue of mice infected with murine hepatitis virus (MHV) strain A59 measured by real-time PCR (n = 5). (N) Expression of *Ifit1* and urea cycle-associated genes in liver tissue upon poly(I:C) treatment of wild type mice measured by real-time PCR (n = 3). For (A-B) one of two representative experiments are shown. For (D-N) data is derived from one experiment. AU = arbitrary units, AUC = area under curve. Symbols represent the arithmetic mean ±S.E.M. ns = not significant \* P < 0.05 \*\* P < 0.01 (Student's t-test).

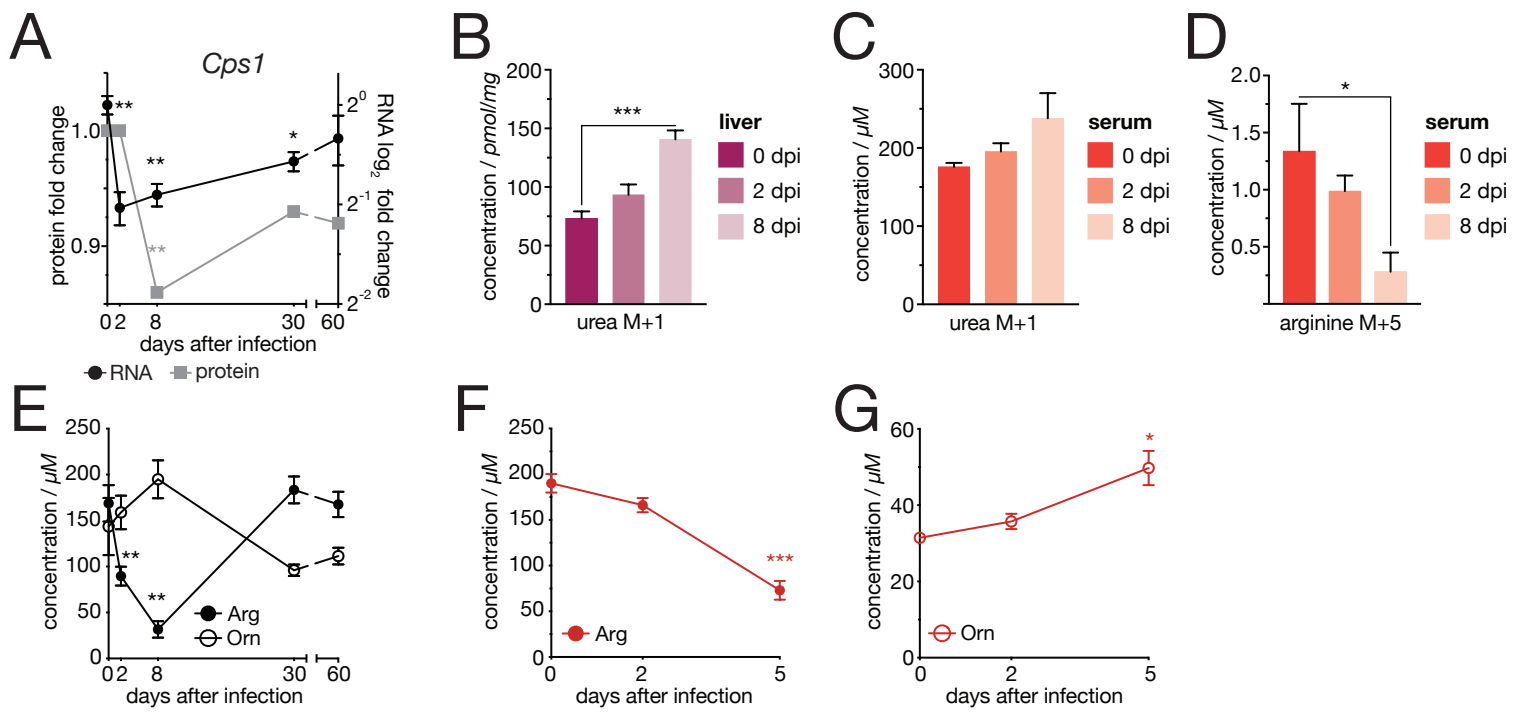

**Figure S5. Viral infection stalls the hepatic urea cycle and correlates with changes in serum levels of arginine and ornithine. Related to Figure 5.**

(A) Transcript and protein levels of *Cps1* in liver tissue of mice infected with LCMV up to 60 days after infection (n = 3). Concentrations of  $^{13}\text{C}_1$  labeled urea in (B) liver tissue, (C) serum and (D)  $^{13}\text{C}_5$  labelled arginine in serum of naïve and LCMV-infected (2 and 8 days after infection) wild type mice (n= 3-6). (E) Serum levels of arginine and ornithine in LCMV-infected wild type mice up to 60 days after infection. (F, G) Serum levels of arginine and ornithine in mice infected with murine hepatitis virus (MHV) strain A59 up to 5 days after infection (n = 5). For (E) two individual biological experiments were pooled. For (A–D and F-G) transcriptomic, metabolomic and metabolite tracing data is derived from one experiment. Symbols represent the arithmetic mean  $\pm$ S.E.M. ns = not significant \* P < 0.05 \*\* P < 0.01 (Student's t-test).



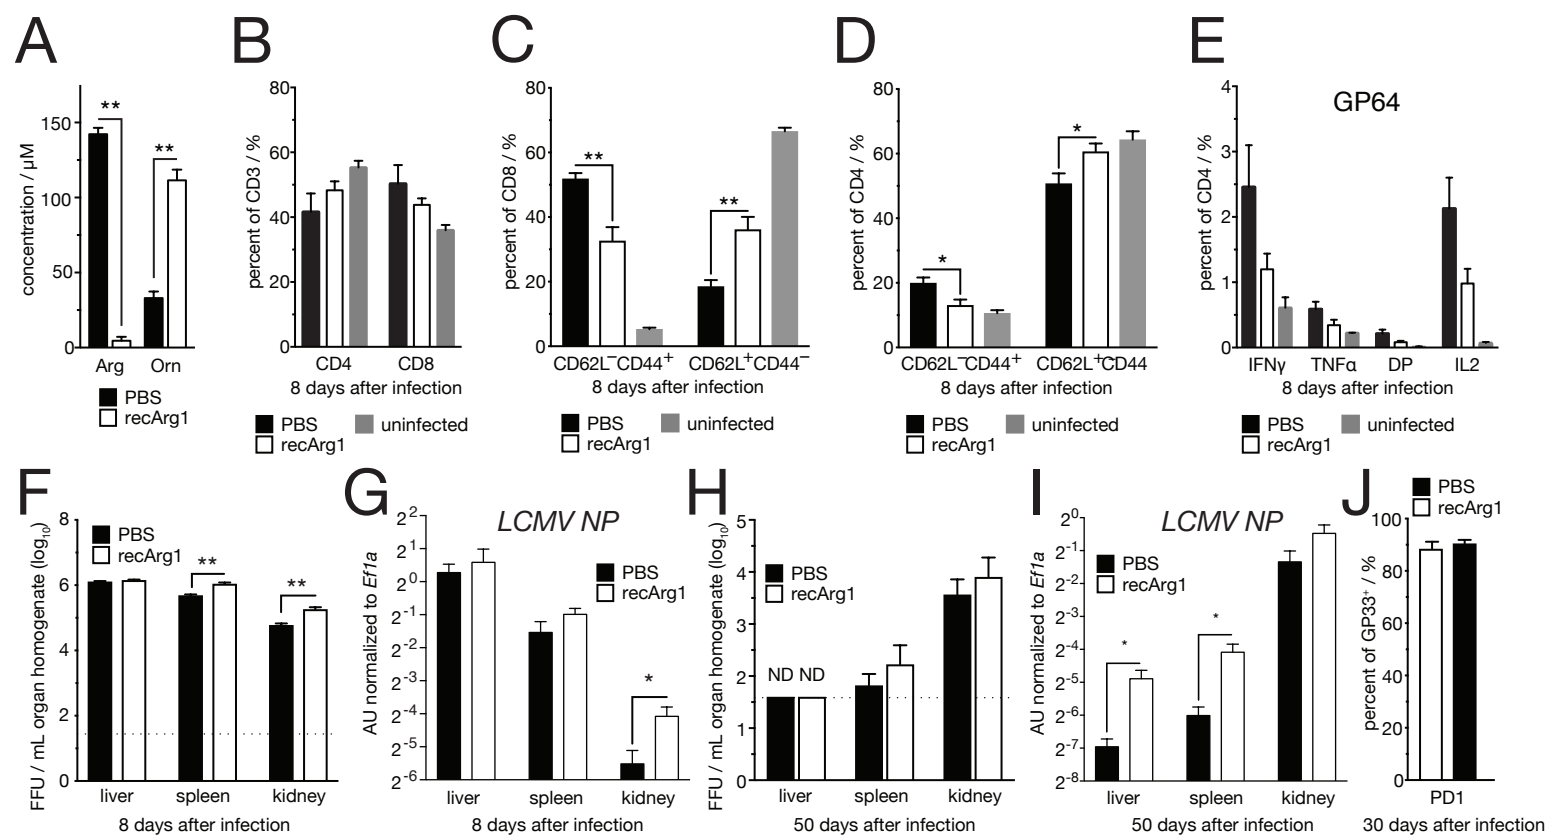

**Table S1: Transcriptomic and proteomic data of LCMV-infected wild type mice. Related to Figure 1.**

**Table S2: Enrichment cluster analysis of differentially expressed genes. Related to Figure 1.**

**Table S3: Metabolomics data of LCMV-infected mice. Related to Figure 1.**

**Table S4: Transcriptomic and gene ontology enrichment data of pair-feeding experiment.**

**Related to Figure 2.**

**Table S5: Transcriptomic and gene ontology enrichment data of *Alb-Cre ERT2 Ifnar1* mice.**

**Related to Figure 3.**
